# Supplementary material for: Influence of dye dispersion on photoelectric conversion properties of dye-containing titania electrodes
Source: Royal Society of Chemistry journal article supplement (doi:10.1039/c3cy00007a), 2013-01-01

## Supplementary information

### Figure S1

(a) Amounts of substance and (b) concentrations of fluorescein contained in the (1) dye-dispersing and (2) dye-adsorbing titania electrodes and eosin Y contained in the (3) dye-dispersing and (4) dye-adsorbing titania electrodes prepared from the systems containing each initial concentration of the dyes.

Figure S1

(a)

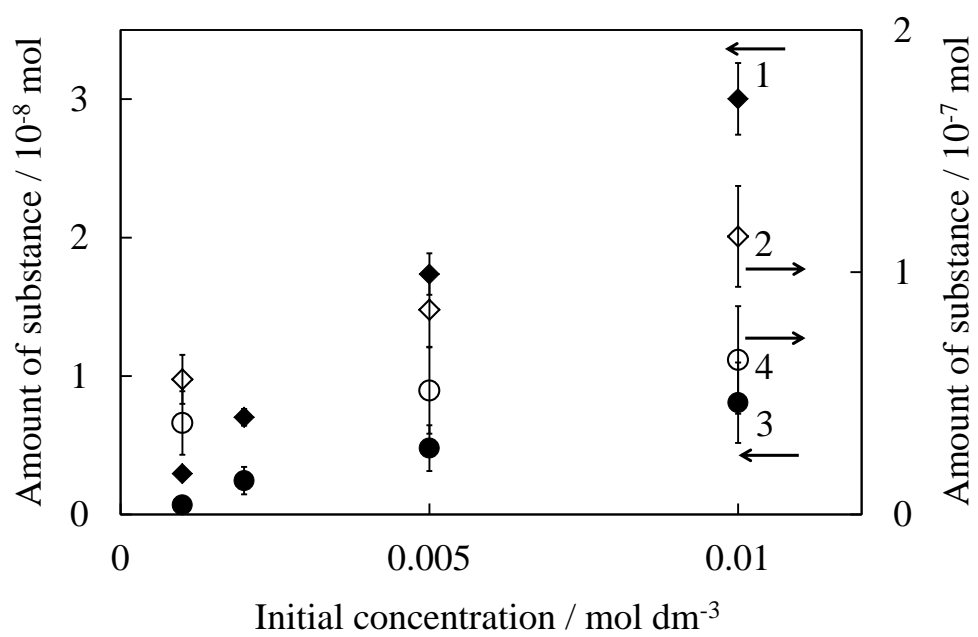

(b)

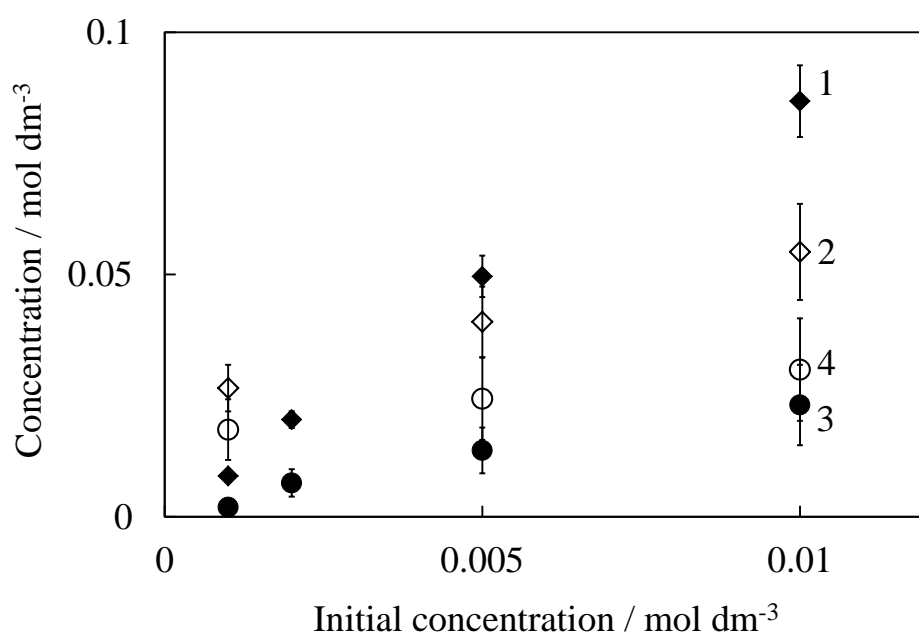

Supplement: c3cy00007a.pdf [file c3cy00007a.pdf]
